# Supplementary material
Source: Springer Nature journal article supplement (https://www.springermedizin.de/resource/supplementary/13601_2014_1068_MOESM1_ESM.pdf/9678628)
Supplement: MOESM1 [file 9678628]

**Positive specific IgE (penicillin) samples in serum bank  
(n=287)**

**$\geq 3$  measurements of specific IgE  
to penicillin (n=29)**

**Inclusion: Serum  $T_{1/2}$  of specific  
IgE to penicillin (n=29)**

**Specific IgE to penicillin  $< 0.35$   
(re-test) (n=42)**

**Inclusion: Penicillin challenge  
(n=22)**
